# Supplementary material for: Predicted superconductivity in one-dimensional A 3 Hf 2 B 3 -type electrides
Source: Royal Society of Chemistry journal article supplement (doi:10.1039/d3ra07383a), 2023-01-01
Supplement: d3ra07383a1.pdf [file d3ra07383a1.pdf]

Supporting information for

**Predicted superconductivity in one-dimensional  $A_3Hf_2B_3$ -type electrifies**

Yulong Chen, Teng Xie, Ziqiang Chen, Zhou Cui, Cuilian Wen\*, and Baisheng Sa\*

*Multiscale Computational Materials Facility & Materials Genome Institute, School of Materials*

*Science and Engineering, Fuzhou University, Fuzhou 350108, P. R. China*

**Corresponding Authors:** \*clwen@fzu.edu.cn (C. Wen); \*bssa@fzu.edu.cn (B. Sa)

Table S1. The structure information and formation energies ( $E_f$ ) for  $\text{Ca}_3\text{Hf}_2\text{Ge}_3$ ,  $\text{Ca}_3\text{Hf}_2\text{Sn}_3$ , and  $\text{Sr}_3\text{Hf}_2\text{Pb}_3$

| Compounds                           | Space group            | Lattice parameters (Å) | $E_f$ (eV/atom) |
|-------------------------------------|------------------------|------------------------|-----------------|
| $\text{Ca}_3\text{Hf}_2\text{Ge}_3$ | $\text{P}\bar{6}3/mcm$ | $a = 8.426, c = 6.084$ | -0.40           |
| $\text{Ca}_3\text{Hf}_2\text{Sn}_3$ | $\text{P}\bar{6}3/mcm$ | $a = 8.972, c = 6.187$ | -0.32           |
| $\text{Sr}_3\text{Hf}_2\text{Pb}_3$ | $\text{P}\bar{6}3/mcm$ | $a = 9.454, c = 6.400$ | -0.05           |

Table S2. The EPC parameter ( $\lambda$ ),  $\omega_{\log}$ ,  $T_c$  for  $\text{Ca}_3\text{Hf}_2\text{Ge}_3$ ,  $\text{Ca}_3\text{Hf}_2\text{Sn}_3$ , and  $\text{Sr}_3\text{Hf}_2\text{Pb}_3$

| Compound                            | Pressure (GPa) | $\lambda$ | $\omega_{\log}$ (K) | $T_c$ (K) |
|-------------------------------------|----------------|-----------|---------------------|-----------|
| $\text{Ca}_3\text{Hf}_2\text{Ge}_3$ | 0              | 0.46      | 139.35              | 1.16      |
| $\text{Ca}_3\text{Hf}_2\text{Ge}_3$ | 15             | 0.54      | 128.09              | 1.96      |
| $\text{Ca}_3\text{Hf}_2\text{Sn}_3$ | 0              | 0.46      | 122.63              | 1.04      |
| $\text{Ca}_3\text{Hf}_2\text{Sn}_3$ | 12             | 0.42      | 138.82              | 0.71      |
| $\text{Sr}_3\text{Hf}_2\text{Pb}_3$ | 0              | 0.74      | 73.62               | 4.02      |
| $\text{Sr}_3\text{Hf}_2\text{Pb}_3$ | 9.3            | 0.67      | 101.08              | 2.69      |

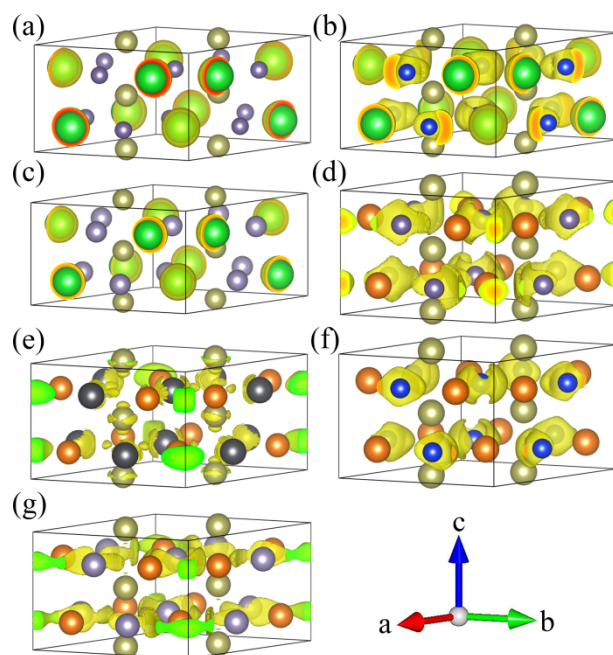

Figure S1. The ELF 3D plots with isosurface value of 0.75 for (a)  $\text{Ba}_3\text{Hf}_2\text{Ge}_3$ , (b)  $\text{Ba}_3\text{Hf}_2\text{Si}_3$ , (c)  $\text{Ba}_3\text{Hf}_2\text{Sn}_3$ , (d)  $\text{Mg}_3\text{Hf}_2\text{Ge}_3$ , (e)  $\text{Mg}_3\text{Hf}_2\text{Pb}_3$ , (f)  $\text{Mg}_3\text{Hf}_2\text{Si}_3$  and (g)  $\text{Mg}_3\text{Hf}_2\text{Sn}_3$ . The isosurfaces are plotted at values of 0.75 in (a, b, c, and f), and 0.55 in (d, e, and g), respectively.

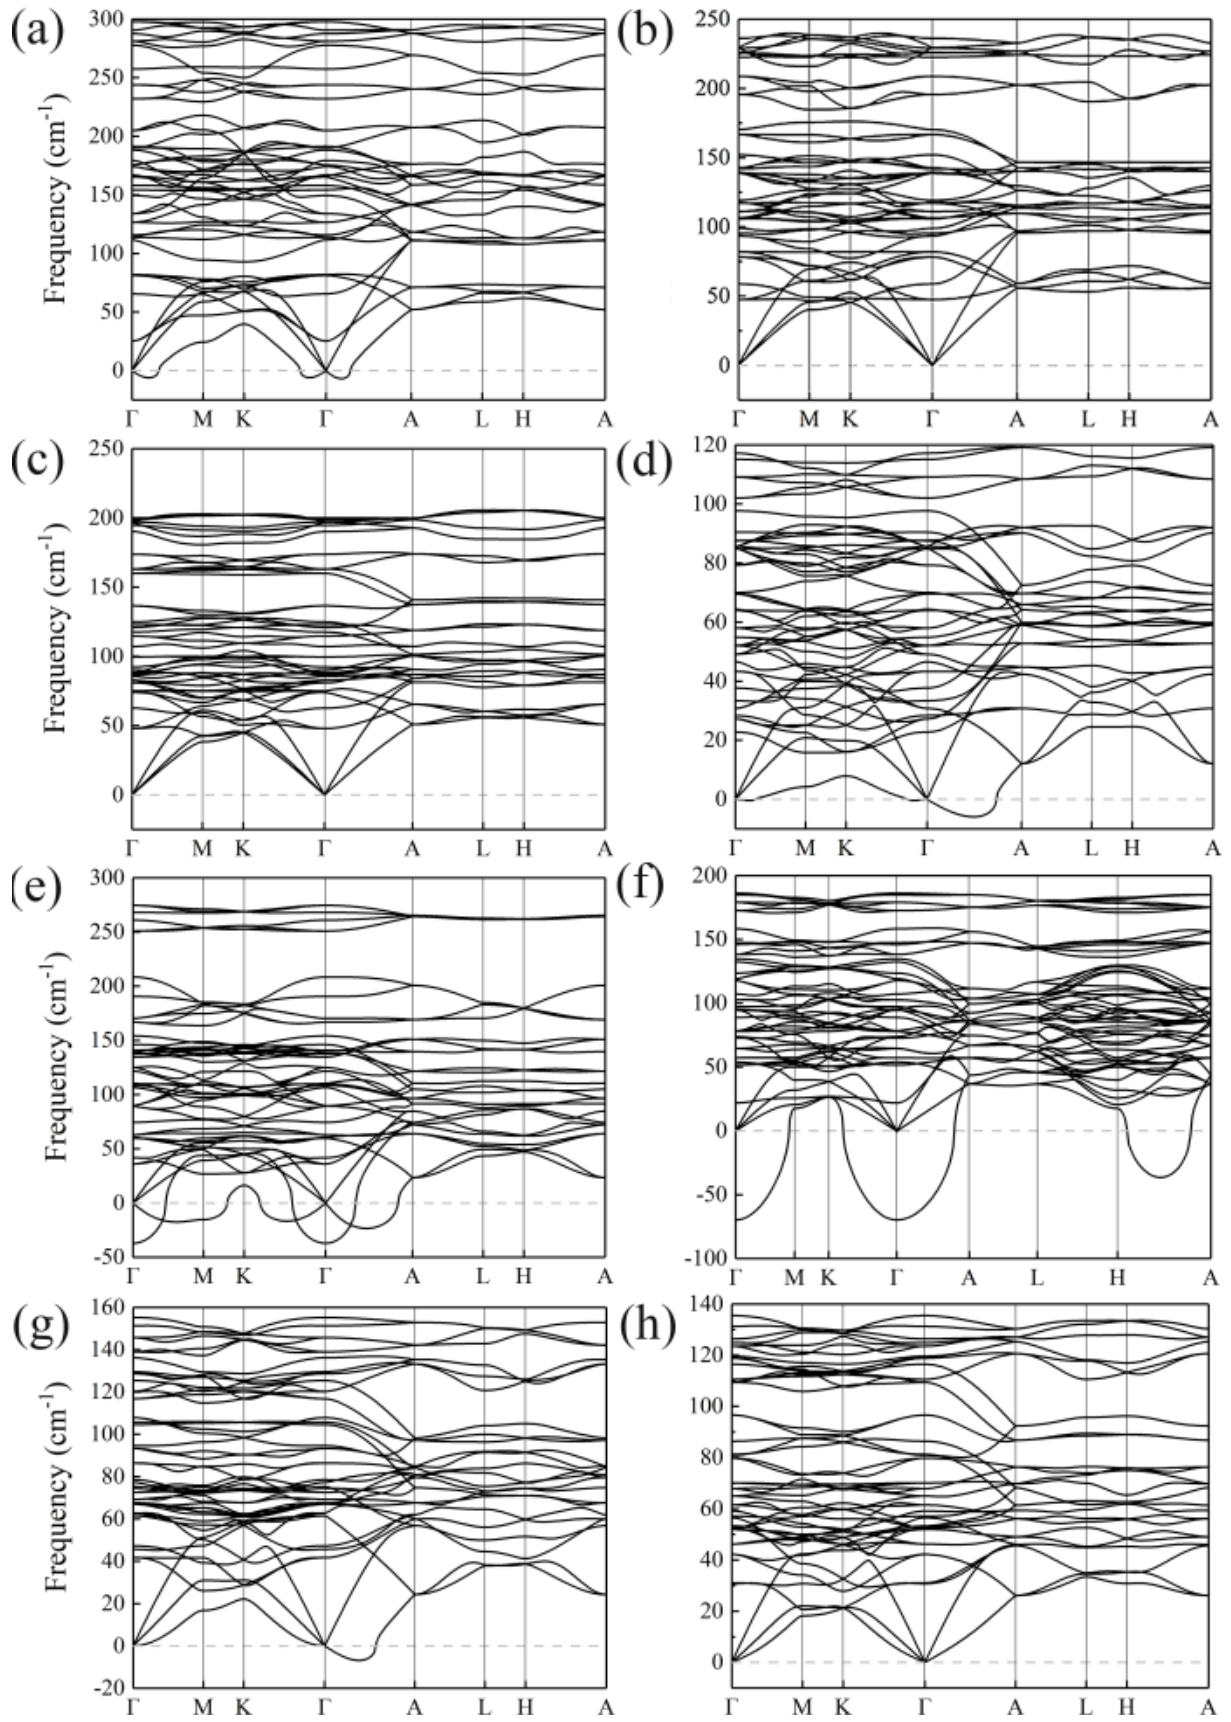

Figure S2. The phonon dispersion curves for (a)  $\text{Ca}_3\text{Hf}_2\text{Si}_3$ , (b)  $\text{Ca}_3\text{Hf}_2\text{Ge}_3$ , (c)  $\text{Ca}_3\text{Hf}_2\text{Sn}_3$ , (d)  $\text{Ba}_3\text{Hf}_2\text{Pb}_3$ , (e)  $\text{Sr}_3\text{Hf}_2\text{Si}_3$ , (f)  $\text{Sr}_3\text{Hf}_2\text{Ge}_3$ , (g)  $\text{Sr}_3\text{Hf}_2\text{Sn}_3$  and (h)  $\text{Sr}_3\text{Hf}_2\text{Pb}_3$ .

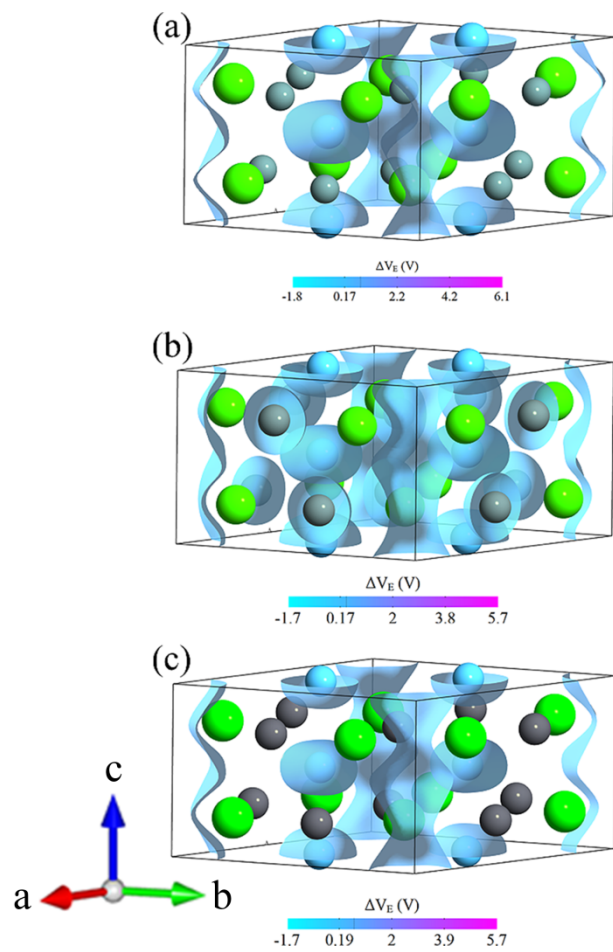

Figure S3. The electrostatic difference potential for (a)  $\text{Ca}_3\text{Hf}_2\text{Ge}_3$ , (b)  $\text{Ca}_3\text{Hf}_2\text{Sn}_3$ , and (c)  $\text{Sr}_3\text{Hf}_2\text{Pb}_3$  with an isosurface value of 0.77 V, 0.38 V, and 0.7 V, respectively.

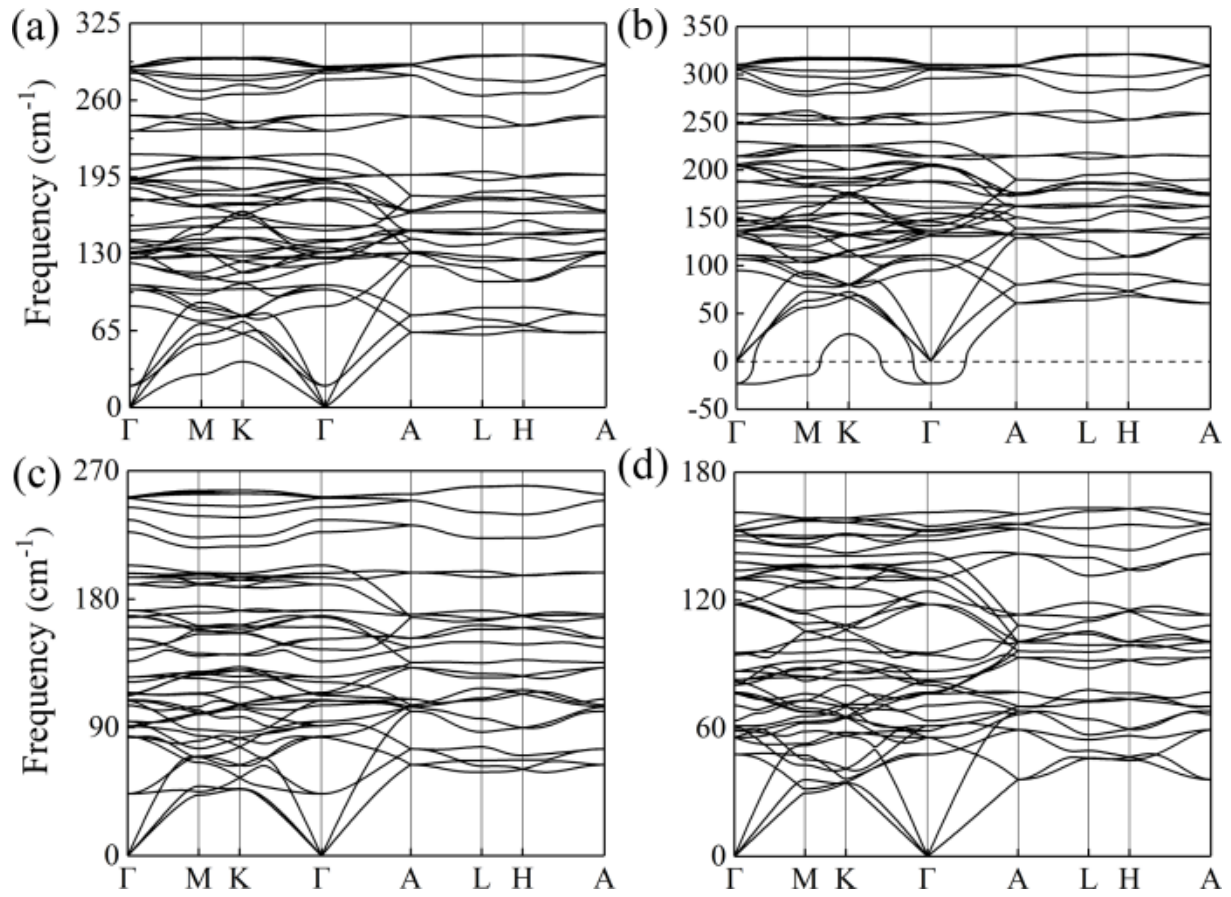

Figure S4. The phonon dispersion curves for  $\text{Ca}_3\text{Hf}_2\text{Ge}_3$  at (a) 15 GPa, (b) 20 GPa, (c)  $\text{Ca}_3\text{Hf}_2\text{Sn}_3$  at 12 GPa, and (d)  $\text{Sr}_3\text{Hf}_2\text{Pb}_3$  at 9.3 GPa.

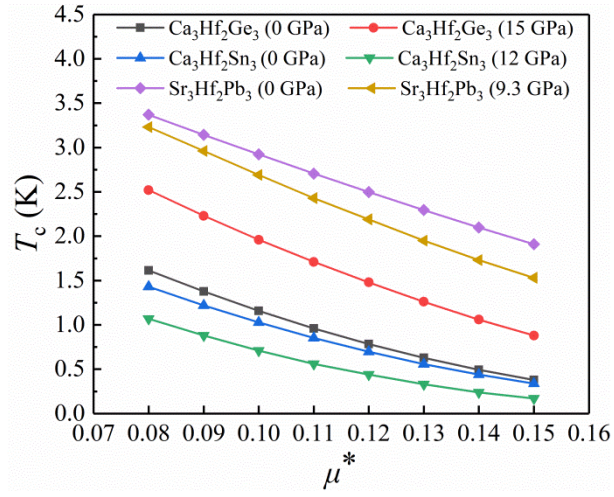

Figure S5. The variation of superconducting transition temperature  $T_c$  for  $\text{Ca}_3\text{Hf}_2\text{Ge}_3$ ,  $\text{Ca}_3\text{Hf}_2\text{Sn}_3$ ,  $\text{Sr}_3\text{Hf}_2\text{Pb}_3$  with the Coulomb pseudopotential coefficient under different pressures.
